# Supplementary material for: A rapid and simple single-stage method for Ca separation from geological and biological samples for isotopic analysis by MC-ICP-MS
Source: Royal Society of Chemistry journal article supplement (doi:10.1039/c7ja00370f), 2018-01-01
Supplement: c7ja00370f1.xlsx [file c7ja00370f1.xlsx]

## Sheet: Sheet1
Table S1 Calcium isotopic compositions of standard materials
RM namea	Description	Ca/Sr ratiob	δ44/42Ca	2s	n
Alfa Ca		113000	0.32	0.06	28
NIST SRM 915b	Calcium carbonate	2667	0.36	0.06	6
replicate			0.364508	0.0693594	3
replicate			0.354594	0.0816771	3
Average			0.359701	0.00992746	3
Seawater	Seawater	51.15	0.92	0.02	4
replicate			0.86	0.07	4
replicate			0.913592	0.0455433	3
replicate			0.948667	0.0588759	3
Average			0.910565	0.0739982	4
DTS-1	Dunite	3797	0.72	0.04	5
replicate			0.688439	0.00829907	3
replicatec			0.744885	0.0433577	3
replicatec			0.699863	0.0358124	3
Average			0.713297	0.0495465	4
DNC-1	Dolerite	570	0.4	0.06	4
replicate			0.368464	0.0201799	3
replicate			0.432108	0.0477307	3
replicate			0.391917	0.0980162	3
Average			0.398122	0.052621	4
BHVO-2	Basalt	210	0.4	0.04	5
replicate			0.414634	0.0368041	3
replicate			0.396748	0.0190464	3
replicate			0.442356	0.051394	3
Average			0.413435	0.0415817	4
BCR-2	Basalt	147	0.38	0.02	5
replicate			0.41	0.03	4
replicate			0.4	0.04	3
replicate			0.442019	0.0444537	3
Average			0.408005	0.0517599	4
NOD-P-1	Manganese Nodule	33	0.39	0.02	3
replicate			0.415158	0.0605579	3
replicate			0.36117	0.08958	3
Average			0.388776	0.0540299	3
NOD-A-1	Manganese Nodule	63	0.6	0.06	3
replicate			0.616833	0.134711	3
replicate			0.630923	0.0932158	3
replicate			0.545092	0.0596679	3
Average			0.598212	0.0752031	4
SBC-1	Shale	118	0.21	0.09	6
replicate			0.266224	0.03334	3
replicate			0.278485	0.0483406	3
replicate			0.228971	0.0645362	3
Average			0.24592	0.0637733	4
NIST SRM 1400	Bone Ash	1533	-0.53	0.05	6
replicate			-0.45292	0.0518977	3
replicate			-0.529477	0.0192156	3
replicate			-0.49537	0.0527712	3
Average			-0.501942	0.0729546	4
NIST SRM 1486	Bone Ash	1007	-0.49	0.03	5
replicate			-0.458255	0.0539683	3
replicate			-0.475371	0.0796713	3
replicate			-0.45074	0.0310833	3
replicate			-0.487585	0.0777565	3
Average			-0.47239	0.0349057	5
NIST SRM 1570a	Spinach Leaves	275	0.08	0.04	4					·
replicate			0.0644754	0.0493035	3
replicate			0.105017	0.026253	3
replicate			0.122002	0.0733076	3
Average			0.0928736	0.0512263	4
GSH-1	Human Hair	188	0.36	0.03	5
replicate			0.41675	0.0657842	3
replicate			0.399499	0.0885749	3
replicate			0.382081	0.0638969	3
Average			0.389583	0.0485496	4
GSV-3	Poplar Leaves	118	0.5	0.04	5
replicate			0.463595	0.094428	3
replicate			0.543026	0.0566284	3
replicate			0.508672	0.0489296	3
Average			0.503823	0.0652516	4
GSV-4	Tea leaves	283	-0.09	0.04	5
replicate			-0.0763393	0.0162325	3
replicate			-0.0422274	0.0472546	3
Average			-0.0695222	0.0492101	3
a replicate was measured from independent digestion of the given sample.
b Ca/Sr ratios were collected from USGS, NIST and IGEG certificates, respectively.
c DTS-1 digested by HClO4+HF method following Yokoyama et al. 19991
1.T. Yokoyama, A. Makishima and E. Nakamura, Chem. Geol, 1999, 157, 175-187.
